# Supplementary material
Source: publisher site journal article supplement (https://www.dovepress.com/article/328404)
Supplement: Supplementary file 1 [file get_supplementary_file.php]

1 3 e-Tables, 1 e-Figure

2

3

## **Online-Data-Supplement**

4

5

### **Anemia Severely Reduces Health-Related Quality**

6

### **of Life in COPD Patients Receiving Long-Term**

7

### **Home Non-Invasive Ventilation**

8

9

Maximilian Wollsching-Strobel<sup>1</sup>, Sarah Bettina Schwarz<sup>1</sup>, Tim Mathes<sup>1</sup>, Daniel Sebastian

10

Majorski<sup>1</sup>, Pouya Heidari<sup>1</sup>, Doreen Kroppen<sup>1</sup>, Friederike Sophie Magnet<sup>1</sup>, Wolfram Windisch<sup>1</sup>

11

12

<sup>1</sup>Cologne Merheim Hospital, Department of Pneumology, Kliniken der Stadt Köln; gGmbH,

13

Witten/Herdecke University, Faculty of Health/School of Medicine, Cologne and Witten, North

14

Rhine-Westphalia, Germany

15 **e-Table 1** Multiple linear regression analysis 1 with the SRI summary scale score as the  
 16 dependent variable (N=128)

| Independent variables                                                   | Mean difference<br>95%CI (lower/upper limit) | P-value |
|-------------------------------------------------------------------------|----------------------------------------------|---------|
| Age (for each additional year)                                          | 0.100 ; -0.272/0.437                         | 0.595   |
| Sex (women vs. men)                                                     | 2.603 ; -3.506/8.711                         | 0.400   |
| BMI (for each additional index-point)                                   | -0.185 ; -0.563/0.192                        | 0.333   |
| Duration of NIV (for each additional month)                             | -0.075 ; -0.214/0.064                        | 0.286   |
| *Exacerbation history (positive vs. negative)                           | -9.969 ; -15.613/-4.326                      | 0.001   |
| Updated Charlson comorbidity index<br>(for each additional index-point) | 0.479 ; -1.116/2.074                         | 0.553   |
| Hemoglobin level (for each additional g/dl)                             | 1.483 ; -0,178/3.143                         | 0.080   |

17 **Notes:** \*Dichotomized category as defined in the text

18 **Abbreviations:** CI, confidence interval; NIV, non-invasive ventilation; SRI, Severe Respiratory  
 19 Insufficiency Questionnaire; BMI, body mass index

20 **e-Table 2** Multiple linear regression analysis 1 with SRI scores as the dependent variables  
 21 (N=128)

| Independent variables                                               | Mean difference<br>95%CI (lower/upper limit) | P-value |
|---------------------------------------------------------------------|----------------------------------------------|---------|
| Dependent variable SRI subscale score: Respiratory complaints       |                                              |         |
| *Exacerbation history (positive vs. negative)                       | -8.835 ; -15.702/-1.970                      | 0.012   |
| Hemoglobin level (for each additional g/dl)                         | 0.754 ; -1.266/2.774                         | 0.461   |
| Dependent variable SRI subscale score: Physical functioning         |                                              |         |
| Exacerbation history                                                | -7.493 ; -15.378/-0.392                      | 0.062   |
| Hemoglobin level                                                    | 2.021 ; -0.299/4.341                         | 0.087   |
| Dependent variable SRI subscale score: Attendant symptoms and sleep |                                              |         |
| Exacerbation history                                                | -8.416 ; -16.280/-0.551                      | 0.036   |
| Hemoglobin level                                                    | 0.786 ; -1.528/3.100                         | 0.503   |
| Dependent variable SRI subscale score: Social relationships         |                                              |         |
| Exacerbation history                                                | -10.849 ; -17.977/-3.722                     | 0.003   |
| Hemoglobin level                                                    | 1.256 ; -0.841/3.353                         | 0.238   |
| Dependent variable SRI subscale score: Anxiety                      |                                              |         |
| Exacerbation history                                                | -14.210 ; -22.601/-5.818                     | 0.001   |
| Hemoglobin level                                                    | 1.988 ; -0.481/4.457                         | 0.114   |
| Dependent variable SRI subscale score: Psychological Well-being     |                                              |         |
| Exacerbation history                                                | -9.732 ; -16.522/-2.942                      | 0.005   |
| Hemoglobin level                                                    | 1.508 ; -0.490/3.506                         | 0.138   |
| Dependent variable SRI subscale score: Social functioning           |                                              |         |
| Exacerbation history                                                | -10.130 ; -17.303/-2.956                     | 0.006   |
| Hemoglobin level                                                    | 2.072 ; -0.039/4.182                         | 0.054   |

22 **Notes:** \*Dichotomized categories as defined in the text

23 **Abbreviations:** CI, confidence interval; SRI, Severe Respiratory Insufficiency Questionnaire

24 **e-Table 3** Multiple linear regression analysis 2 with SRI scores as the dependent variables  
 25 (N=128)

| Independent variables                                               | Mean difference<br>95%CI (lower/upper limit) | P-value |
|---------------------------------------------------------------------|----------------------------------------------|---------|
| Dependent variable SRI subscale score: Respiratory complaints       |                                              |         |
| *Exacerbation history (positive vs. negative)                       | -8.697 ; -15.504/-1.889                      | 0.013   |
| *Anemia (positive vs. negative)                                     | -6.021 ; -13.941/1.899                       | 0.135   |
| Dependent variable SRI subscale score: Physical functioning         |                                              |         |
| Exacerbation history                                                | -7.816 ; -15.757/0.125                       | 0.054   |
| Anemia                                                              | -4.555 ; -13.794/4.685                       | 0.331   |
| Dependent variable SRI subscale score: Attendant symptoms and sleep |                                              |         |
| Exacerbation history                                                | -8.119 ; -15.8667/-0.371                     | 0.040   |
| Anemia                                                              | -8.793 ; -17.806/0.221                       | 0.056   |
| Dependent variable SRI subscale score: Social relationships         |                                              |         |
| Exacerbation history                                                | -10.691 ; -17.702/-3.660                     | 0.003   |
| Anemia                                                              | -8.963 ; -17.131/-0.794                      | 0.032   |
| Dependent variable SRI subscale score: Anxiety                      |                                              |         |
| Exacerbation history                                                | -14.124 ; -22.412/-5.837                     | 0.001   |
| Anemia                                                              | -11.178 ; -20.820/-1.535                     | 0.023   |
| Dependent variable SRI subscale score: Psychological Well-being     |                                              |         |
| Exacerbation history                                                | -9.606 ; -16.288/-2.925                      | 0.005   |
| Anemia                                                              | -9.493 ; -17.267/-1.719                      | 0.017   |
| Dependent variable SRI subscale score: Social functioning           |                                              |         |
| Exacerbation history                                                | -10.142 ; -17.250/-3.034                     | 0.006   |
| Anemia                                                              | -9.974 ; -18.244/-1.704                      | 0.019   |

26 **Notes:** \*Dichotomized categories as defined in the text

27 **Abbreviations:** CI, confidence interval; SRI, Severe Respiratory Insufficiency Questionnaire

28 e-Figure Legend

29

30 e-Figure 1 Flow diagram of the statistical analyses.

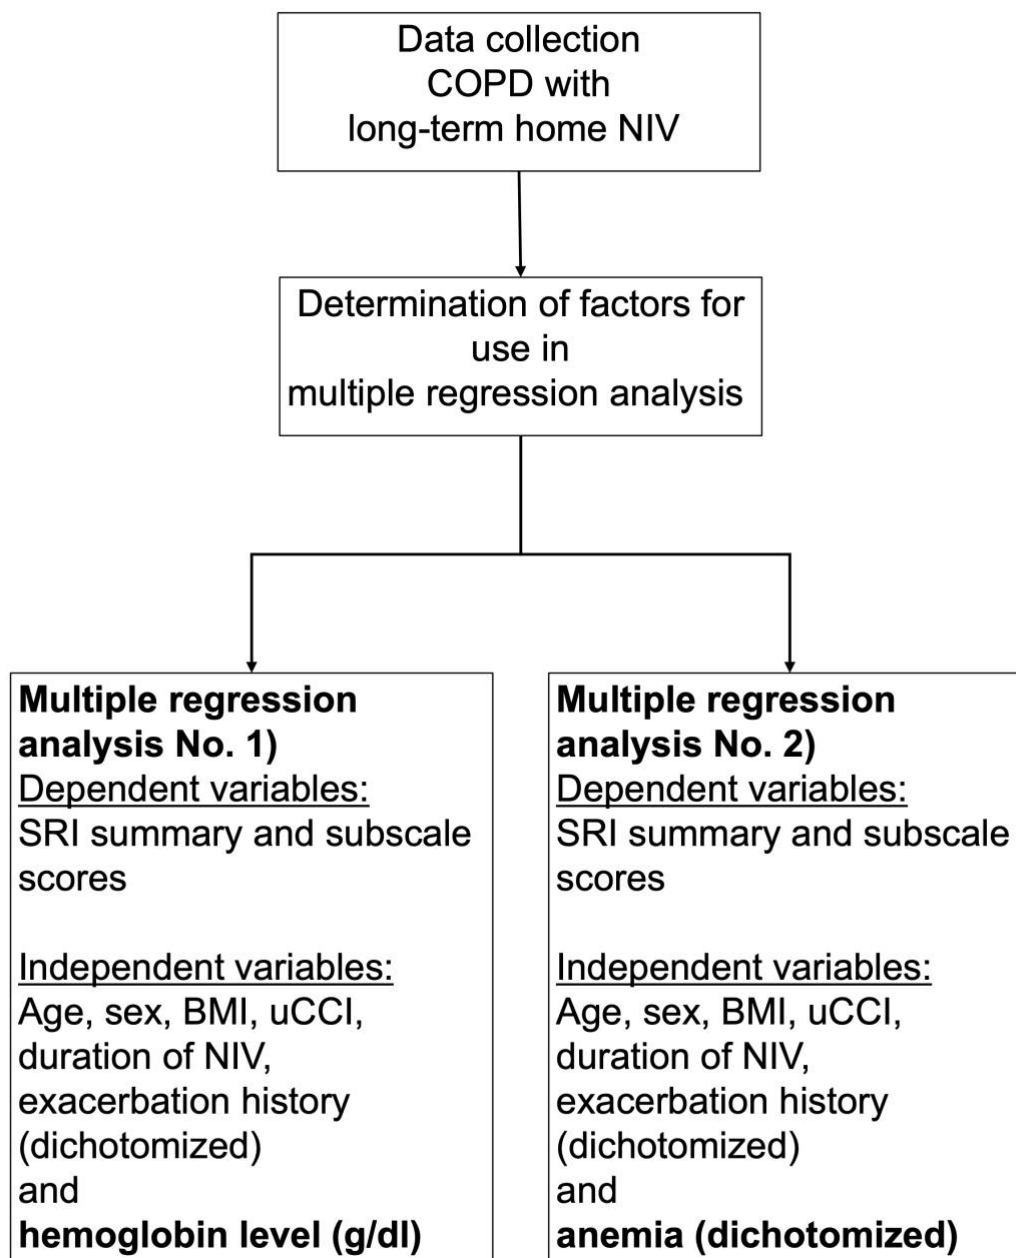

31

32 **Abbreviations:** BMI, body mass index; uCCI, updated Charlson comorbidity index; NIV, non-

33 invasive ventilation; SRI, Severe Respiratory Insufficiency Questionnaire
